# Supplementary material for: Co3O4–C core–shell nanowire array as an advanced anode material for lithium ion batteries
Source: Royal Society of Chemistry journal article supplement (doi:10.1039/c2jm31629c), 2012-01-01
Supplement: c2jm31629c.pdf [file c2jm31629c.pdf]

## Supporting Information

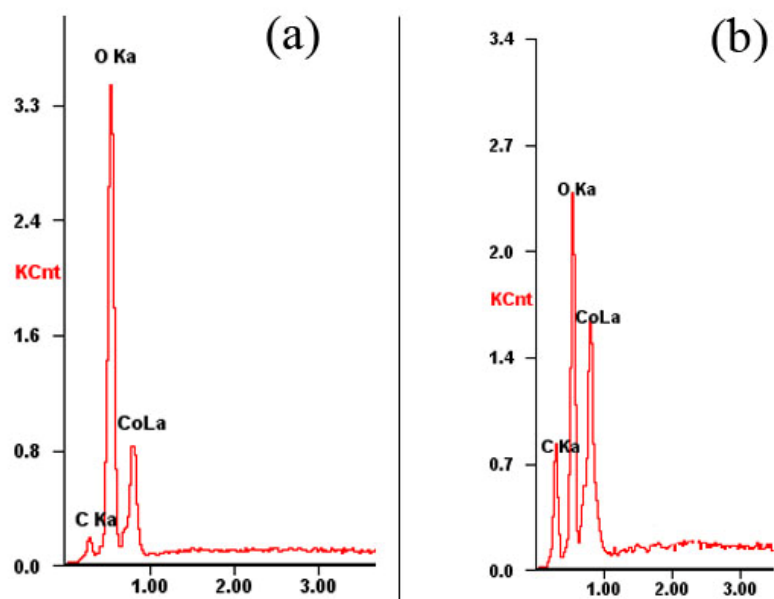

**Fig. S1** EDS of  $\text{Co}_3\text{O}_4$  nanowire arrays (a) before and (b) after carbon coating.
